# Supplementary material
Source: PubMed Central journal article supplement (PMC1315370)

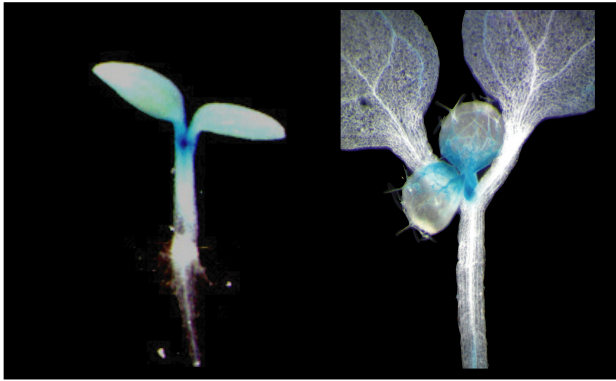

FLC::GUS  
2 DAG

FLC::GUS  
6 DAG

Supplement: plntcell_tpc.105.034645_1.pdf [file plntcell_tpc.105.034645_1.pdf]
